# Supplementary material
Source: publisher figshare collection journal article supplement (https://frontiersin.figshare.com/ndownloader/files/24950384)

Supplementary figure S2. Plots of residuals against year (t).

**Grey Partridge**

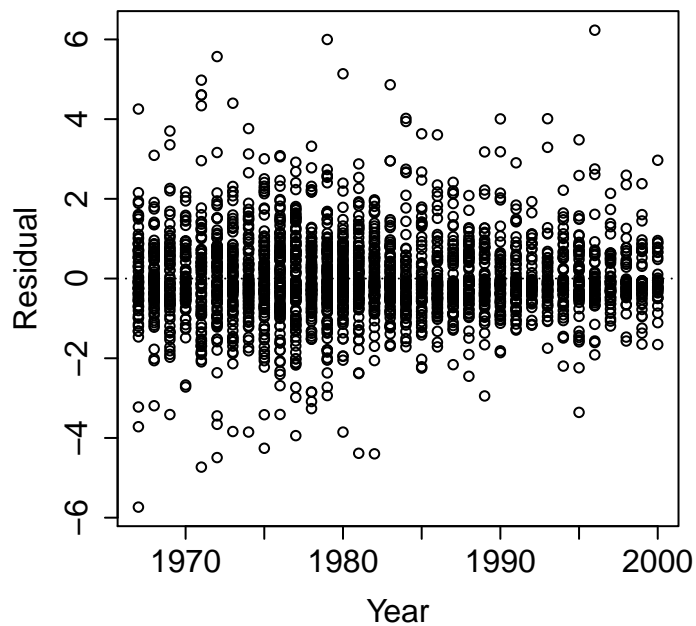

**Lapwing**

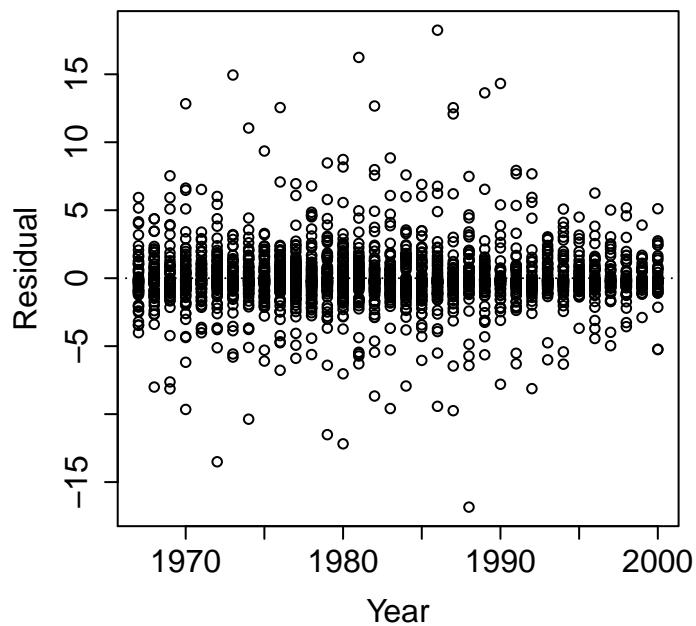

**Turtle Dove**

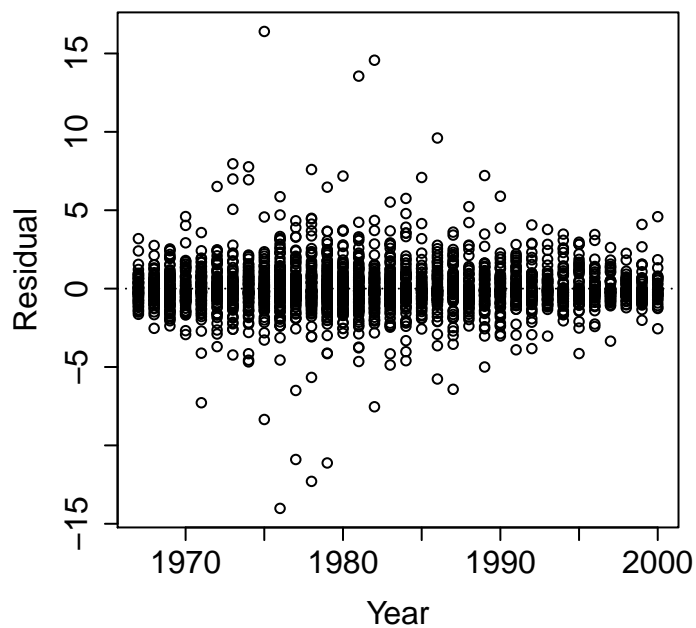

**Blue Tit**

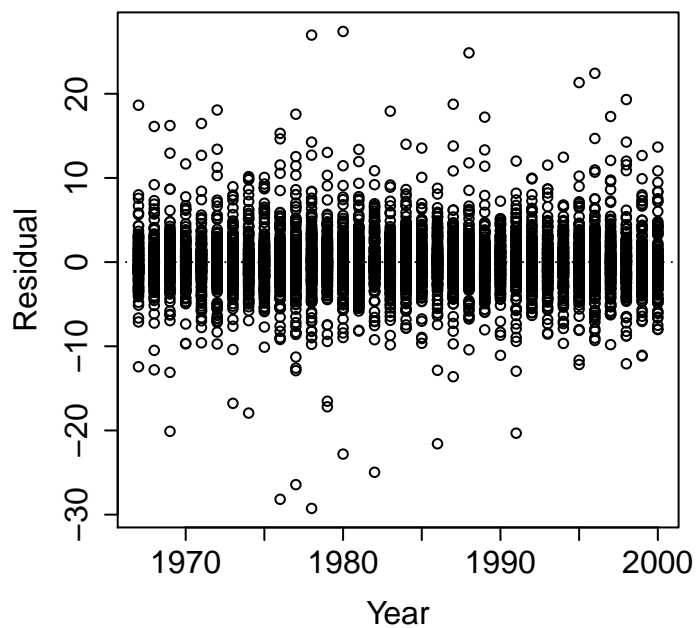

**Great Tit**

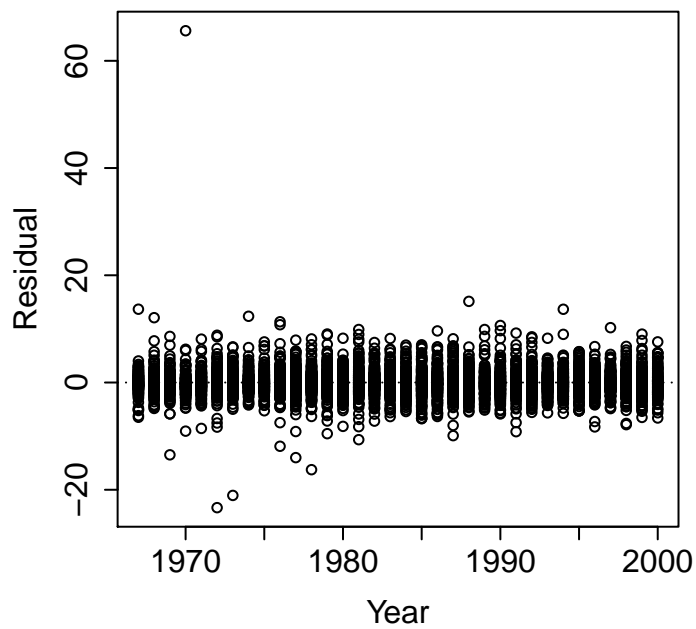

**Coal Tit**

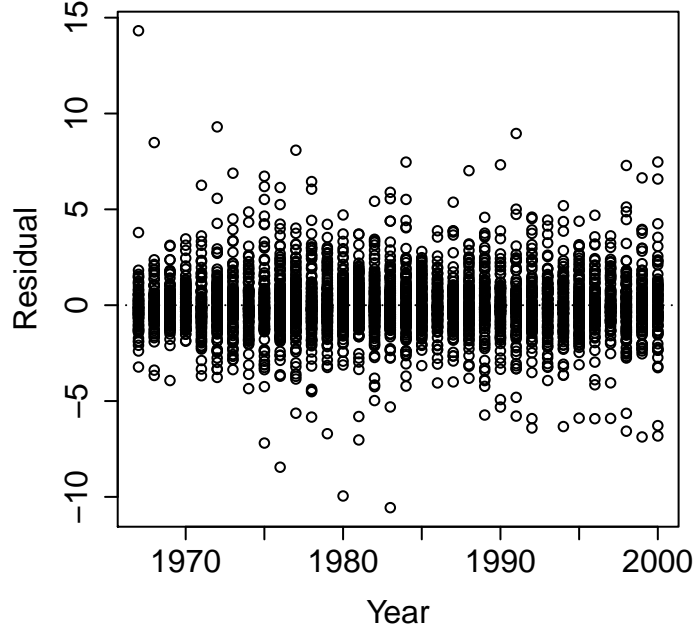

**Willow Tit**

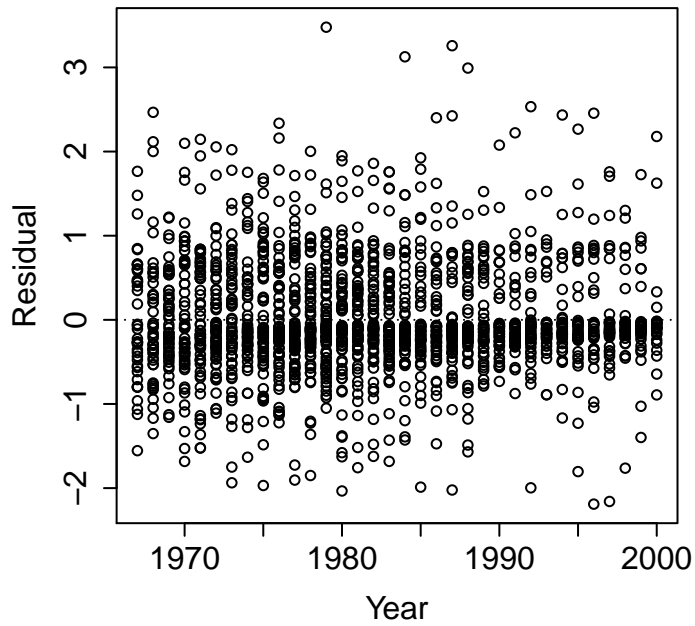

**Marsh Tit**

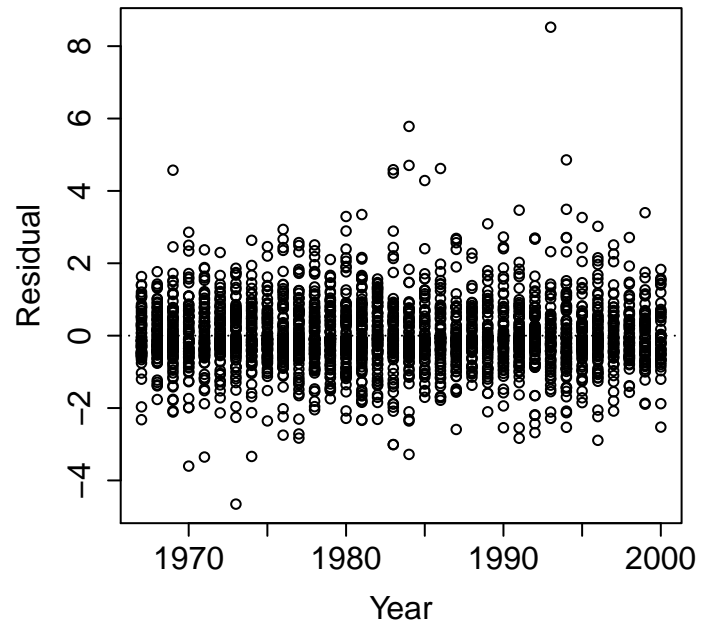

**Skylark**

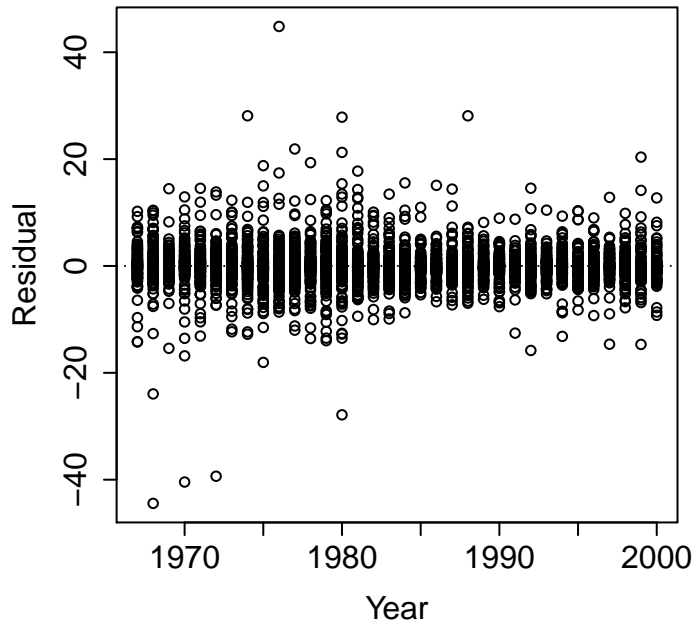

**Long-tailed Tit**

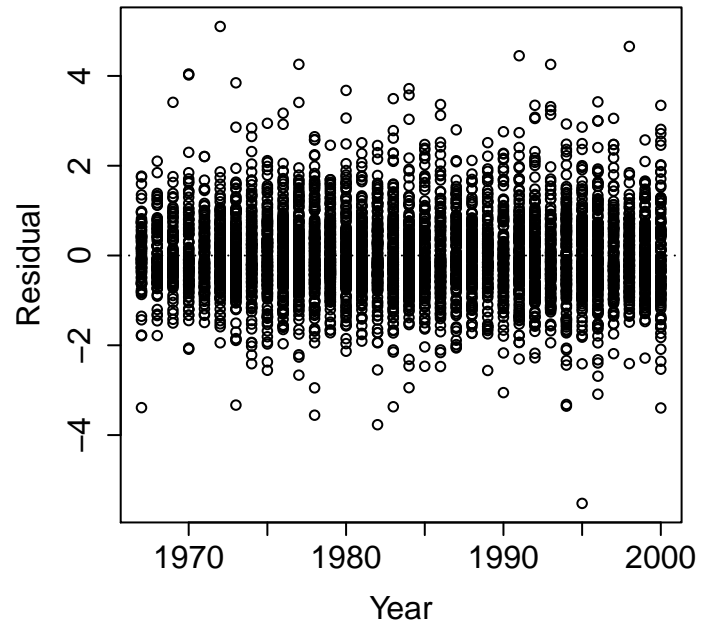

**Wood Warbler**

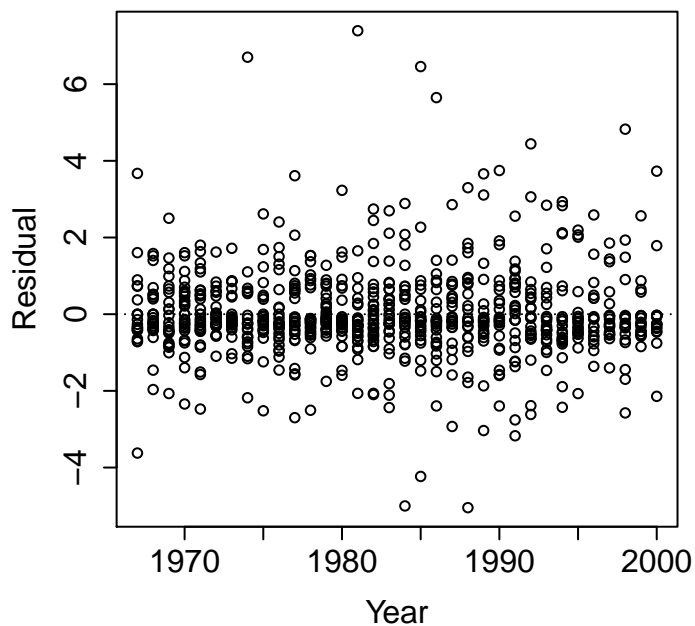

**Chiffchaff**

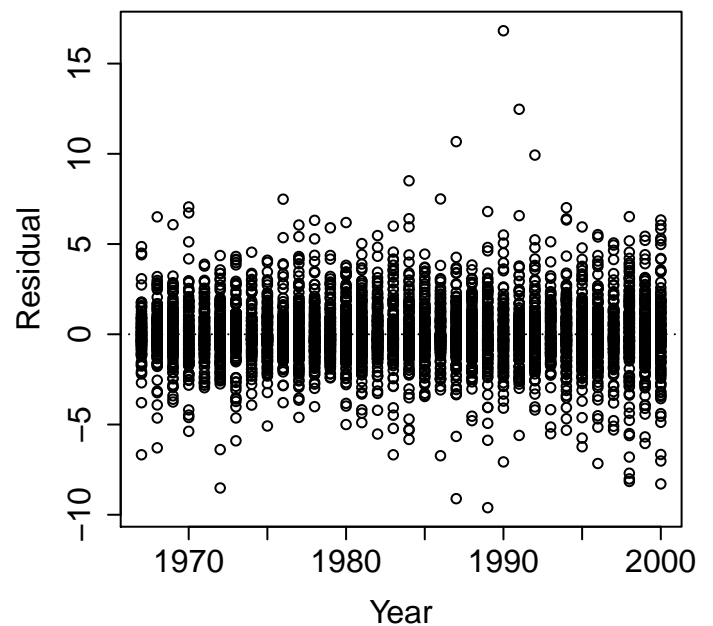

**Willow Warbler**

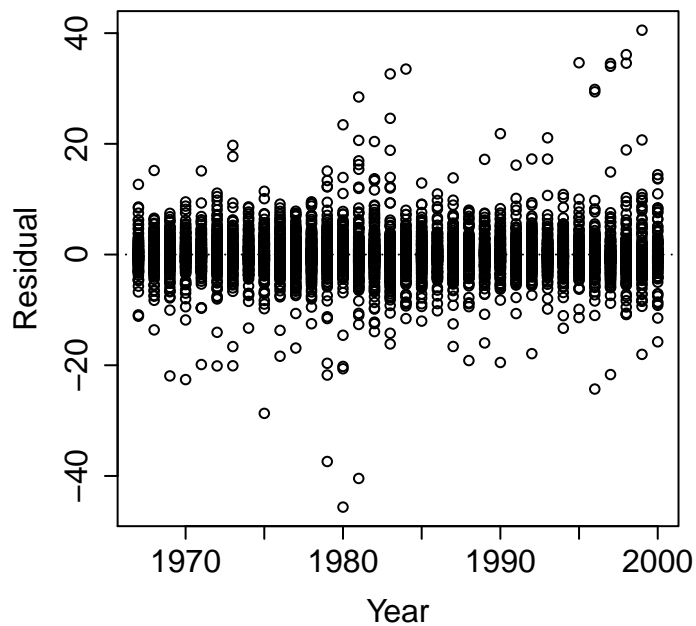

**Whitethroat**

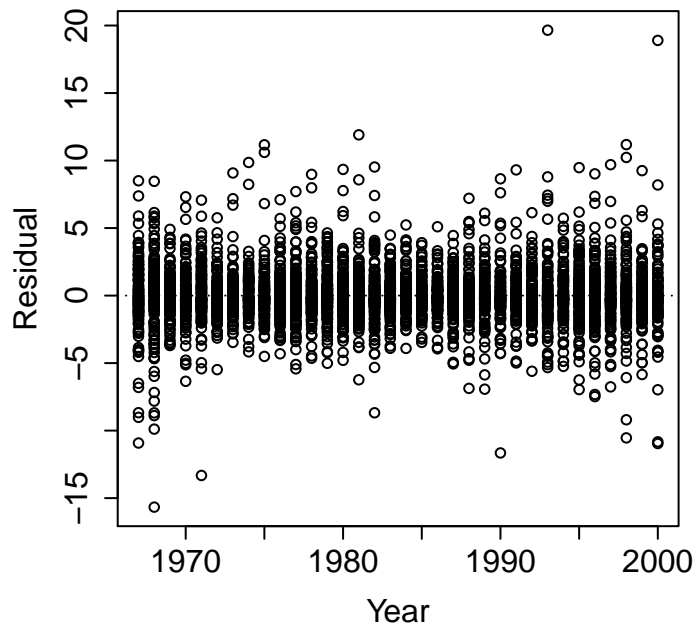

**Nuthatch**

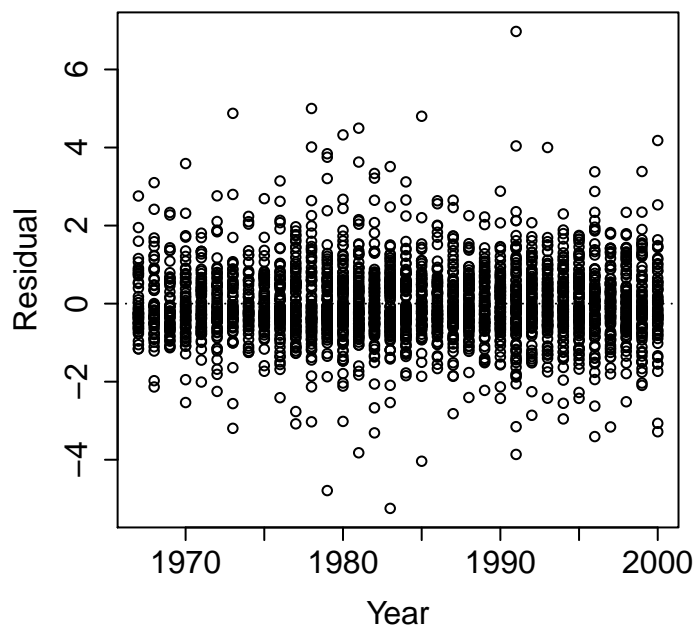

**Treecreeper**

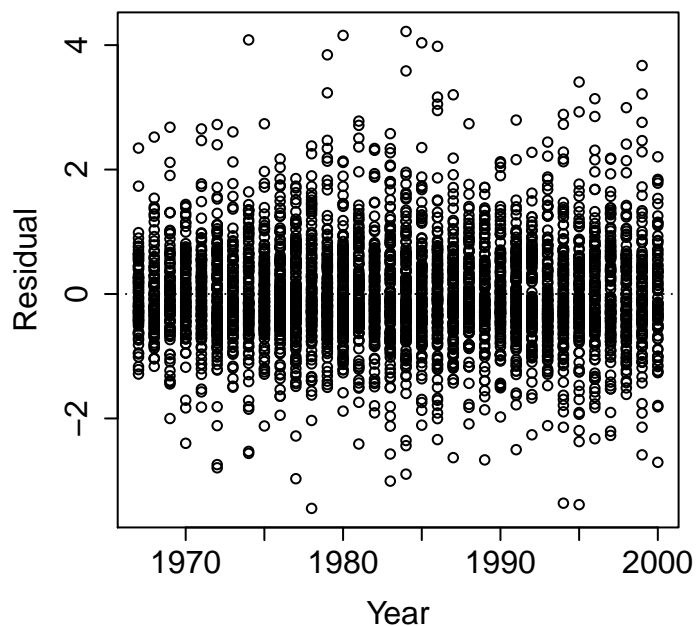

**Wren**

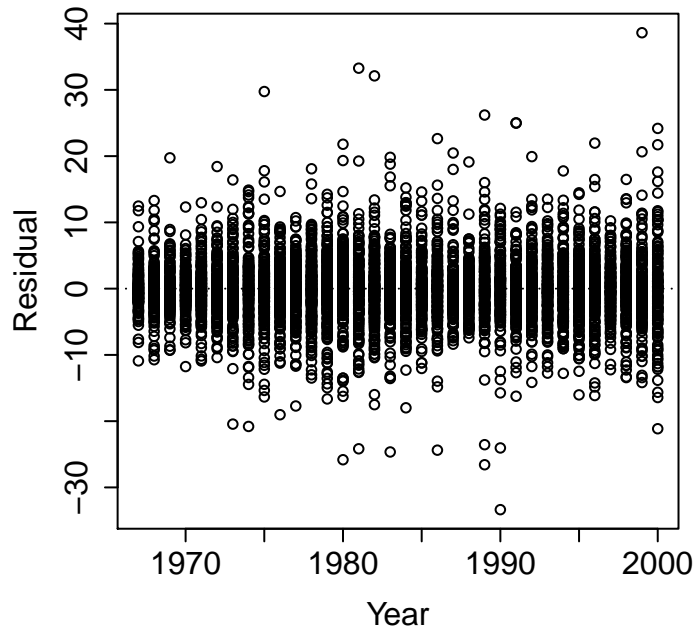

**Starling**

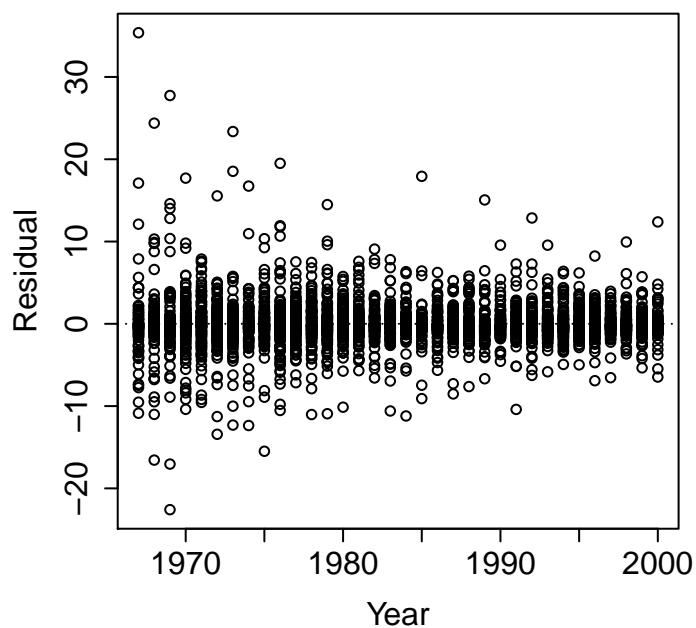

**Blackbird**

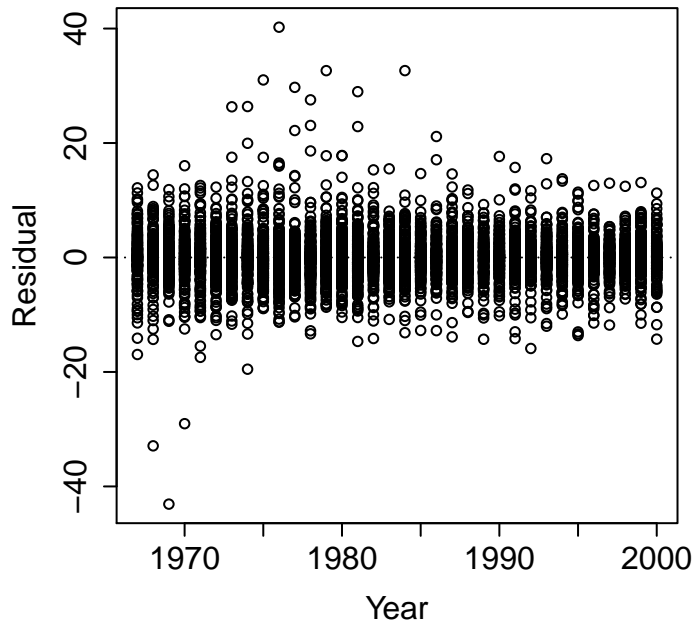

**Song Thrush**

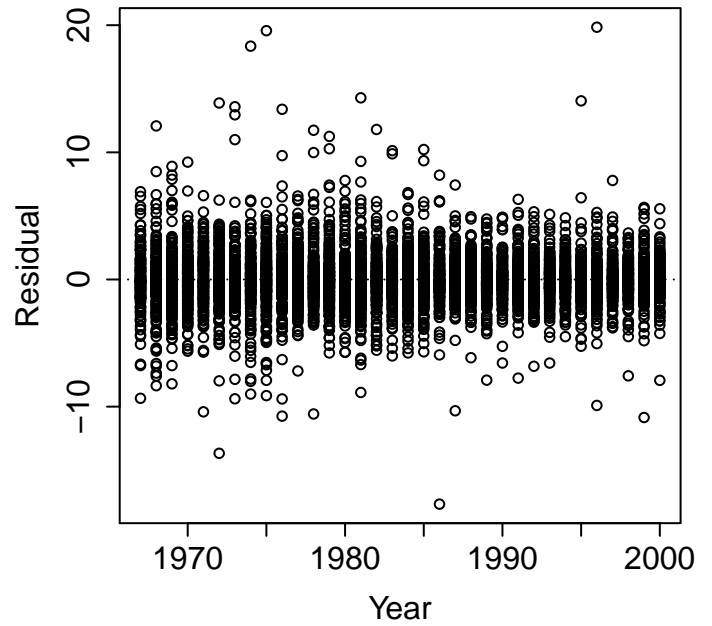

**Mistle Thrush**

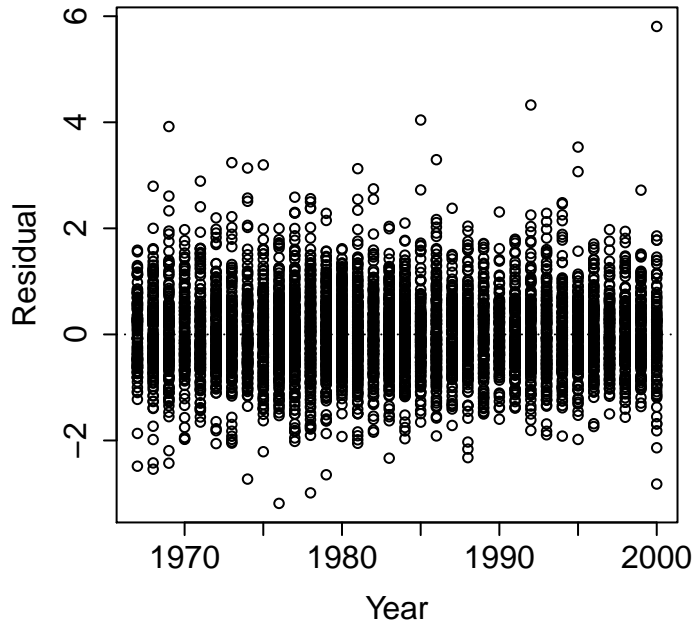

**Spotted Flycatcher**

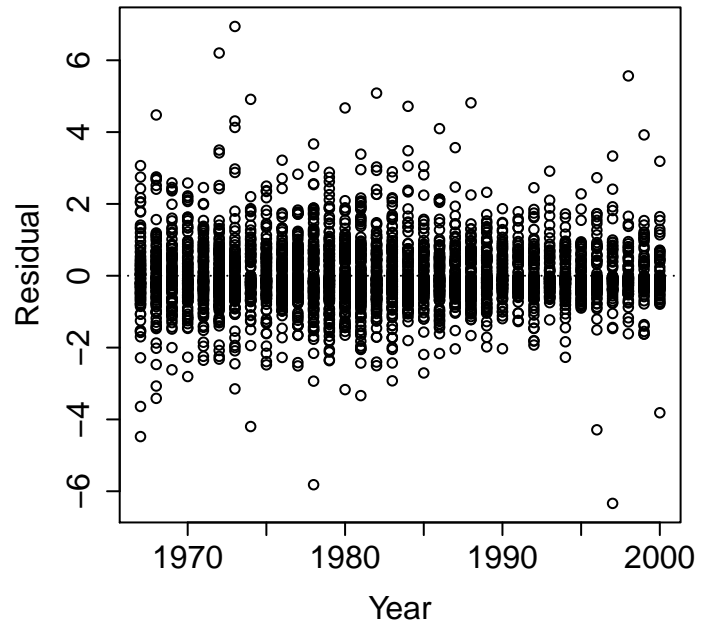

**Robin**

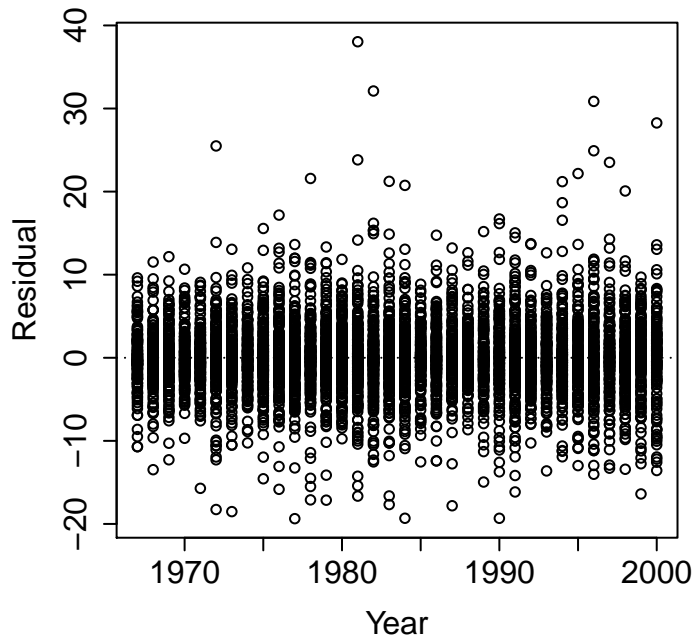

**Dunnock**

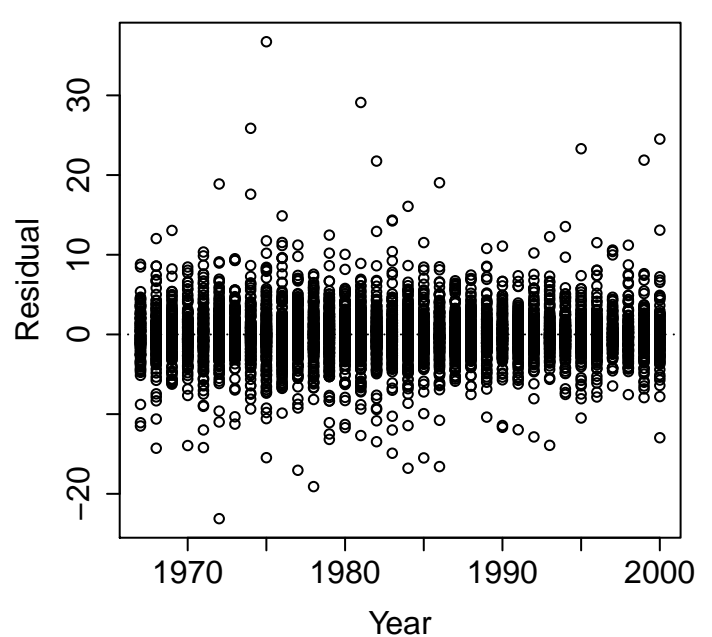

**House Sparrow**

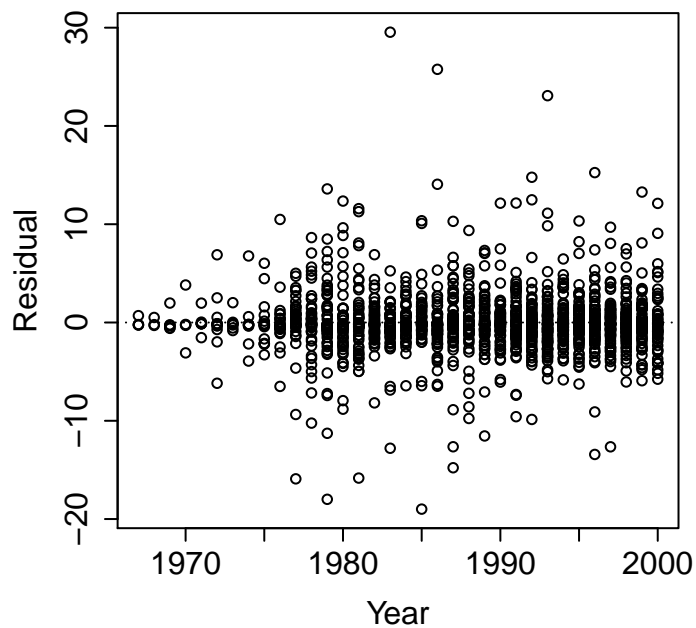

**Tree Sparrow**

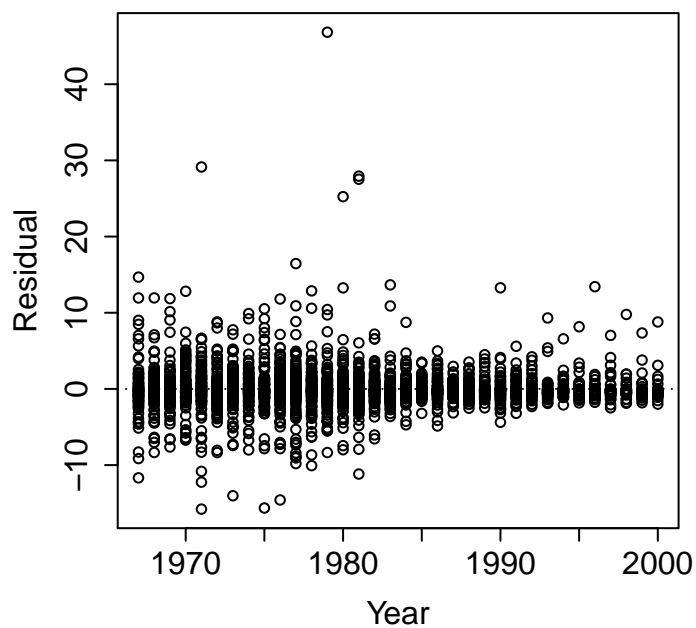

**Yellow Wagtail**

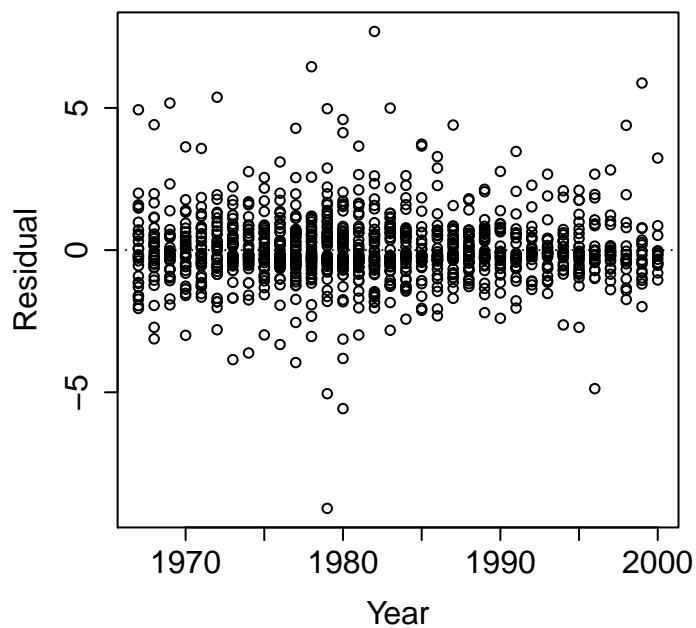

**Grey Wagtail**

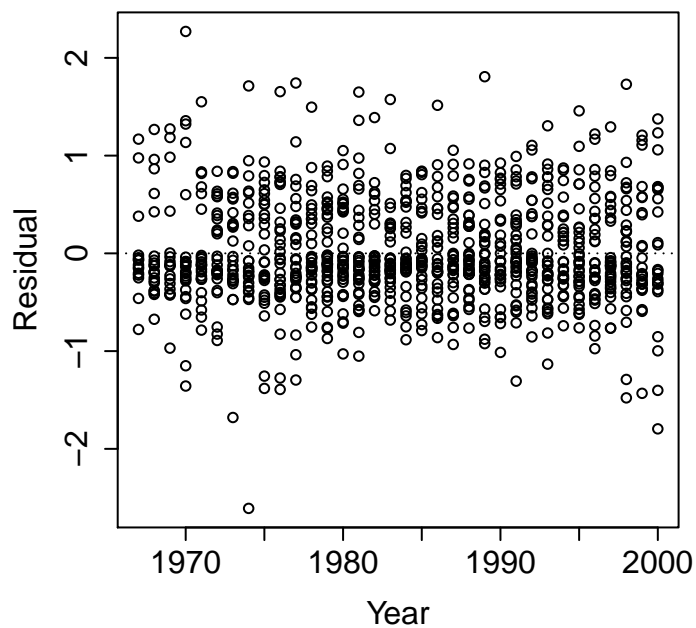

**Pied Wagtail**

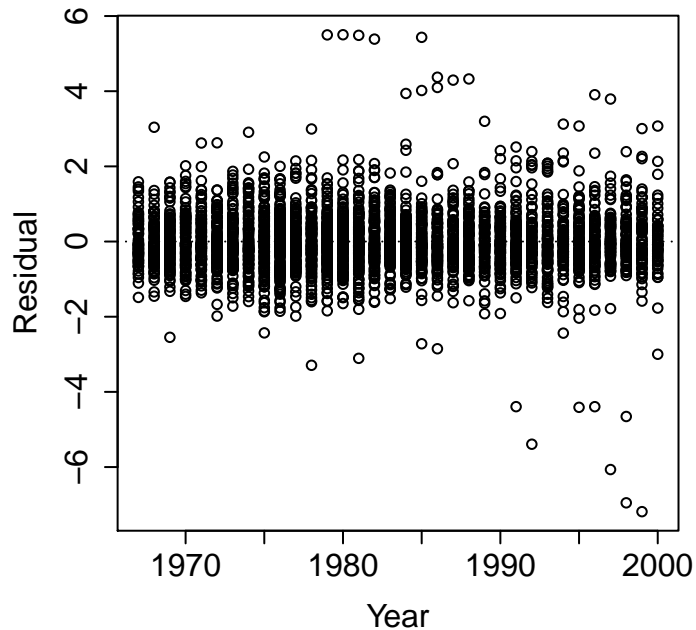

**Tree Pipit**

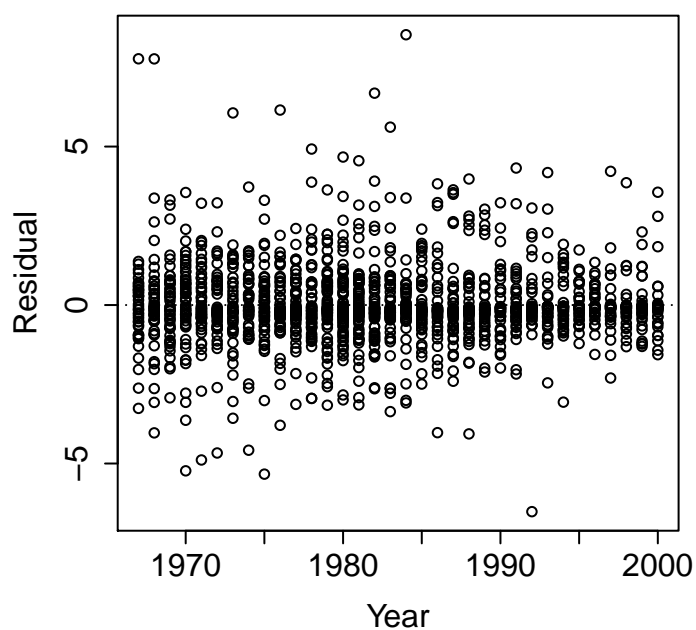

**Meadow Pipit**

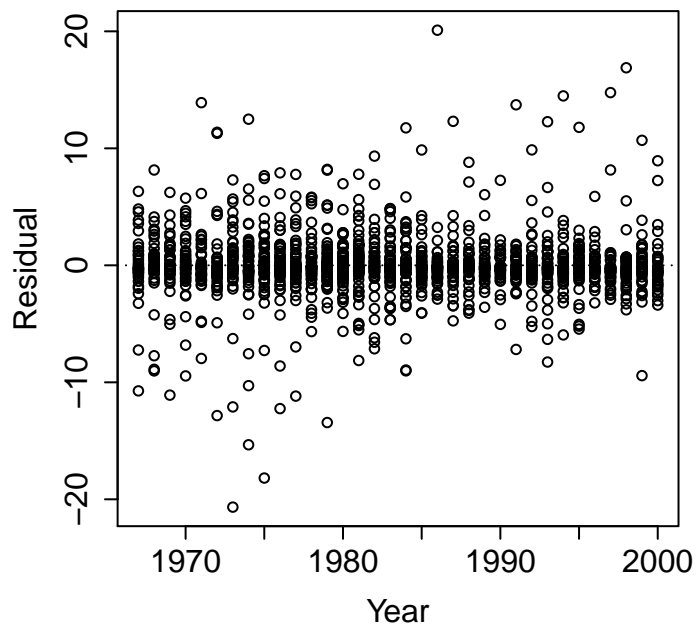

**Chaffinch**

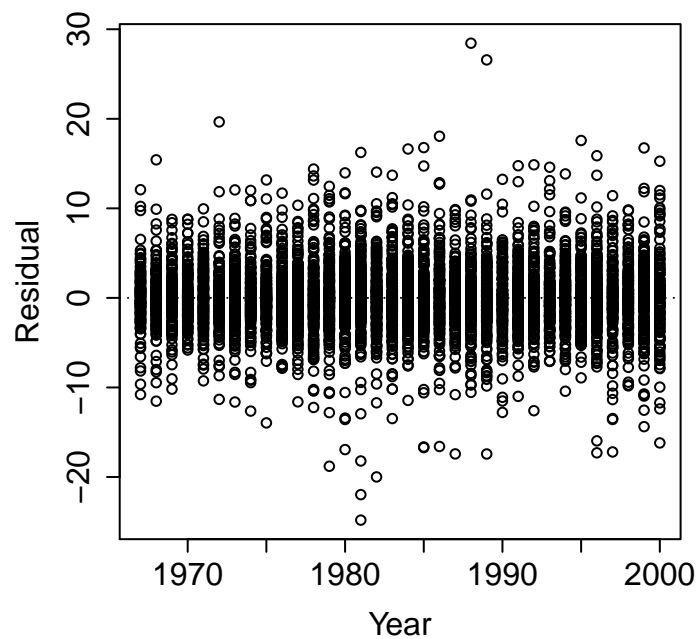

**Bullfinch**

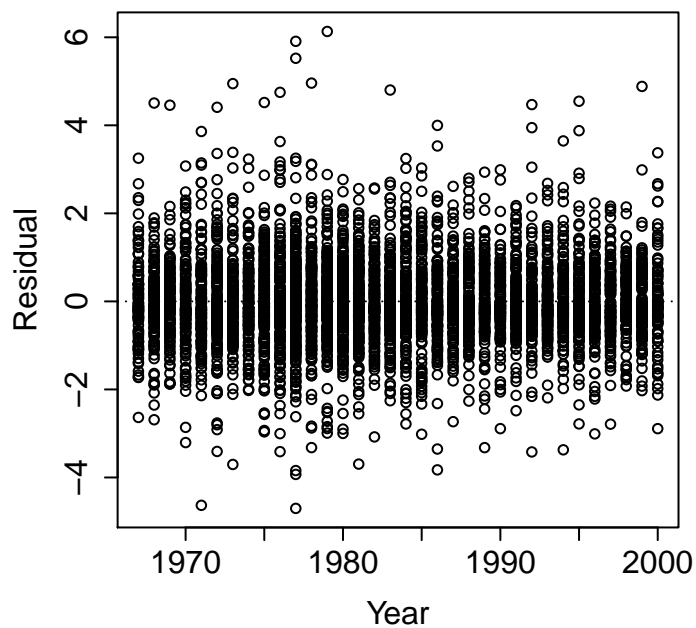

**Greenfinch**

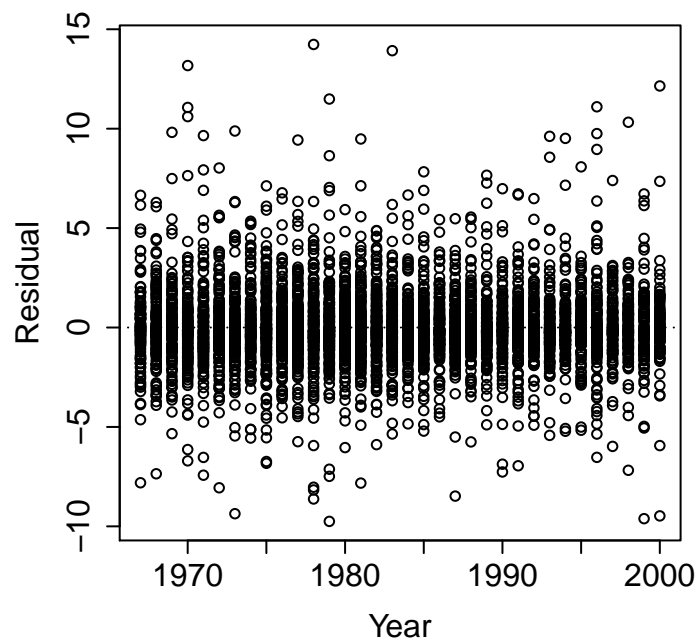

**Linnet**

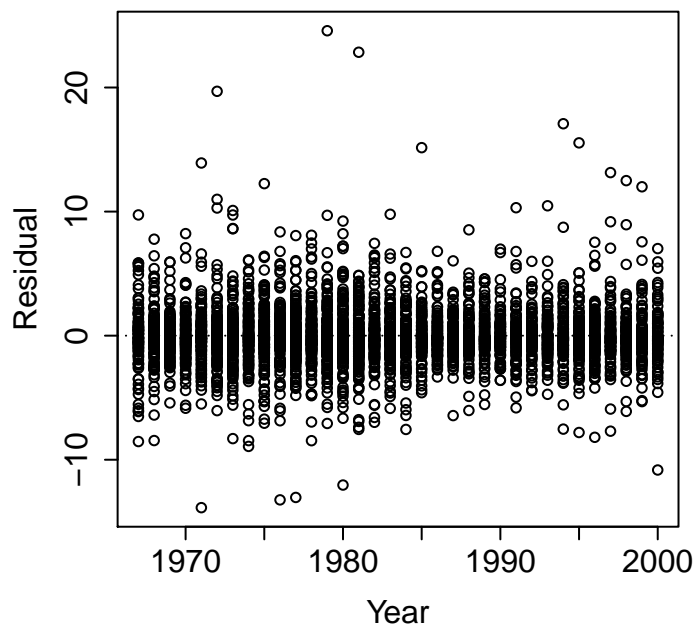

**Redpoll**

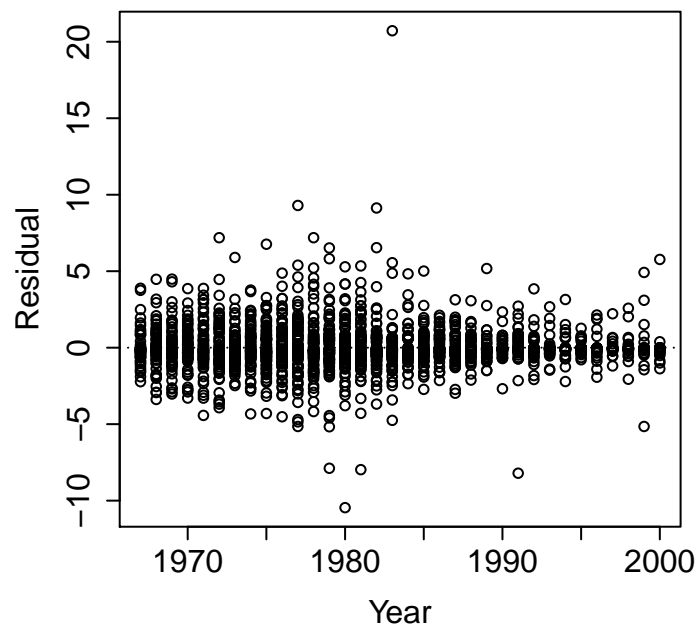

**Goldfinch**

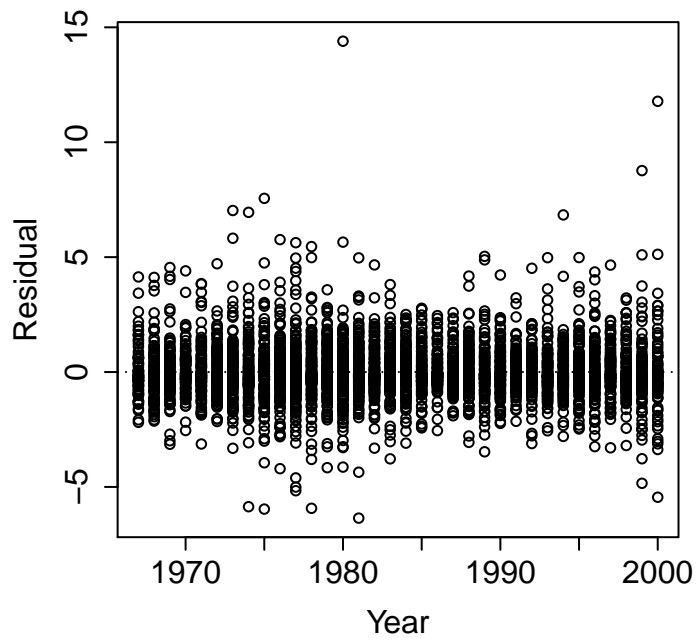

**Corn Bunting**

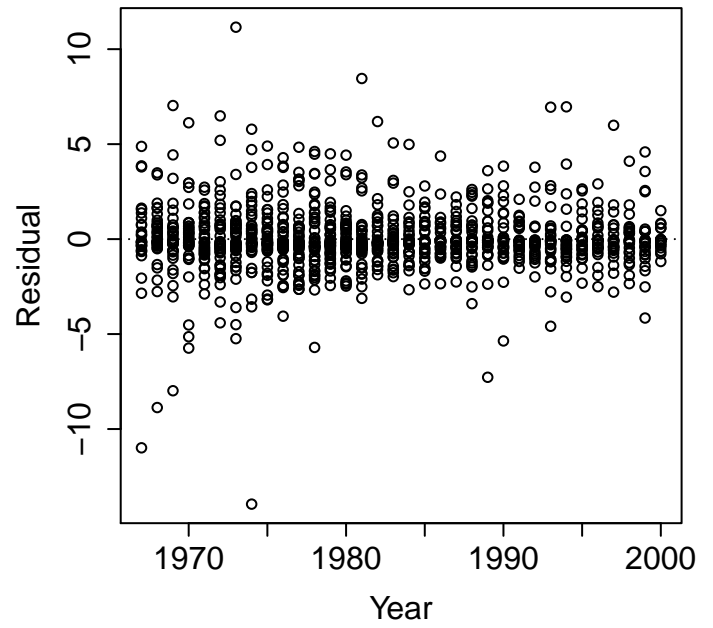

**Yellowhammer**

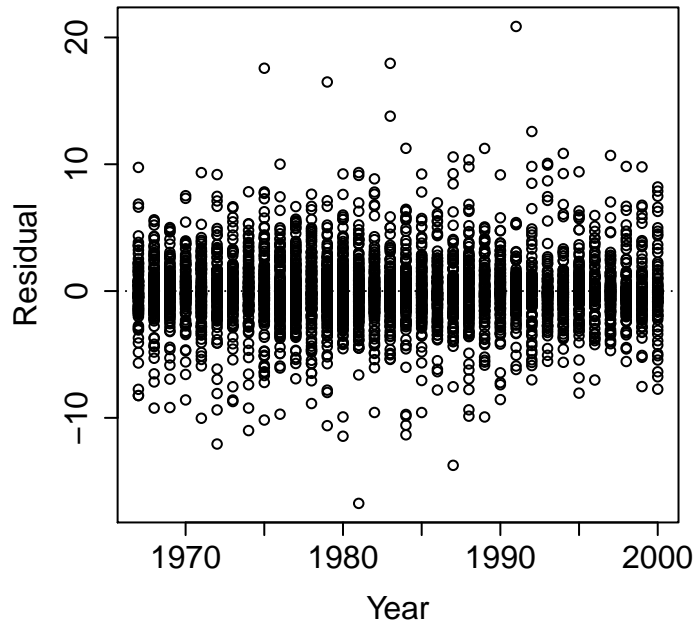

**Reed Bunting**

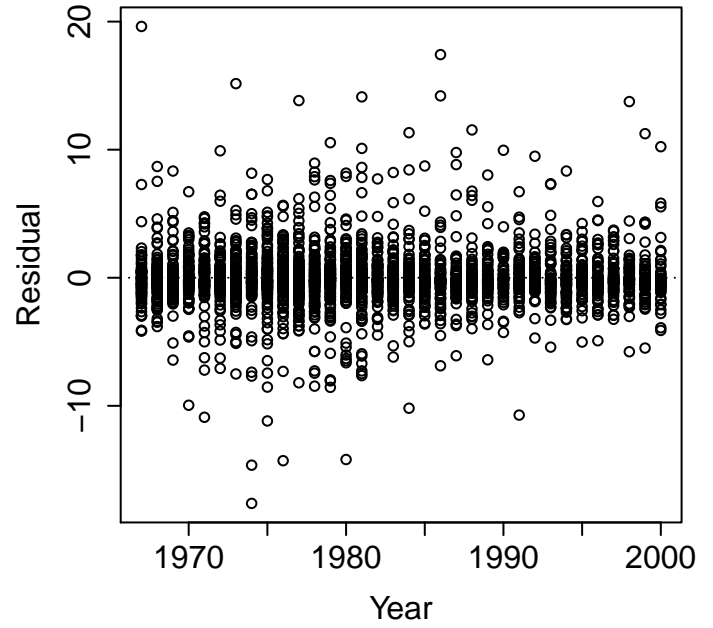

Supplement: Supplementary file 1 [file 24950384]
